# Supplementary material for: A cohort profile and process evaluation of an adult multidisciplinary behavioural and weight management service in a diverse UK population
Source: Research Square preprint supplement (doi:10.21203/rs.3.rs-7724834/v1), 2026-01-30
Supplement: Supplementary file 1 [file 02f9390aced5e87b371b4147.xlsx]

## Sheet: Sheet1
Supplementary Table 2. Predictors of programme completion for the Southeast London Healthy Living programme. Continuous variables, statistical significance p<0.005. Univariate logistic regression, data as OR (95% CI).
	B			SE	Wald		df	p-value	OR		95% CI
Continuous
Weight, kg	-0.02			0.002	1.009		1	0.315	0.998		0.994, 1.002
BMI, kg/m2	0.005			0.008	0.449		1	0.503	1.005		0.99, 1.02
Highest weight, kg	-0.001			0.002	0.201		1	0.654	0.999		0.996, 1.002
Age, y	0.005			0.003	2.298		1	0.13	1.005		0.999, 1.012
Confidence	-0.061			0.024	6.26		1	0.012	0.941		0.897, 0.987
Motivation	-0.038			0.028	1.797		1	0.181	0.963		0.911, 1.018
Deprivation	0.026			0.018	1.946		1	0.163	1.026		0.99, 1.064
Categorical
Programme
Balance F2F	-			-	-			-	-		-
Kickstart F2F	-0.148			0.112	1.751		1	0.186	0.862		0.692, 1.074
Balance Virtual	4.856			0.509	91.15		1	<0.001	128.5		47.4, 348.1
Kickstart Virtual	4.725			0.587	64.857		1	<0.001	112.7		35.7, 356
Programme*
Balance F2F and Virtual	-			-	-			-	-		-
Kickstart F2F and Virtual	-0.038			0.092	0.173		1	0.678	0.962		0.803, 1.153
Sex
Male	-			-	-			-	-		-
Female	0.318			0.109	8.473		1	0.004	1.375		1.11, 1.703
Ethnicity
White	-			-	7.405		2	0.025	-		-
Black African/Caribbean	-0.202			0.99	4.184		1	0.041	0.817		0.673, 0.992
Other	0.143			0.132	1.175		1	0.278	1.154		0.891, 1.495
		B	SE		Wald	df		p-value		OR		95% CI
Relationship status
Single		-	-		2.405	2		0.301		-		-
Married/civil partner		-0.03	0.111		0.071	1		0.79		0.971		0.782, 1.206
Separated/divorced/widowed		-0.232	0.152		2.33	1		0.127		0.793		0.589, 1.068
Deprivation
High					2.085	2		0.353
Moderate		0.115	0.113		1.041	1		0.308		1.122		0.899, 1.401
Low		0.141	0.106		1.744	1		0.187		1.151		0.934, 1.418
* Face to face and virtual programmes were collapsed together for both balance and Kickstart. This was due to the small sample size for both virtual programmes.
