# Supplementary material for: A cohort profile and process evaluation of an adult multidisciplinary behavioural and weight management service in a diverse UK population
Source: Research Square preprint supplement (doi:10.21203/rs.3.rs-7724834/v1), 2026-01-30
Supplement: Supplementary file 2 [file 239bd2b6c6eecdd26160df5d.xlsx]

## Sheet: Sheet1
Supplementary Table 1. Participant characteristics of the Southeast London Tier 3 healthy weight programme at initial assessment (stage 3), session 1 or 2 (stage 2) and programme completion (session 9, 10-12; stage 3).
	Stage 1		Stage 2		Stage 3
	Initial assessment		Session 1 or 2		Completion
	n (%)		n (%)		n (%)
Gender, n	4499		1253		904
Male	987 (22)		293 (23)		169 (19)
Female	3509 (78)		960 (77)		734 (81)
Transgender	3 (0.1)		-		-
Ethnicity, n	4438		1237		884
White	2100 (47)		639 (52)		453 (51)
African-Caribbean	261 (6)		157 (13)		288 (33)
Caribbean	544 (12)		82 (7)		68 (8)
Asian	118 (3)		36 (3)		11 (1)
African	781 (18)		174 (14)		127 (14)
Other	588 (13)		138 (11)		123 (14)
Prefer not to say	46 (1)		11 (1)		9 (1)
Relationship status, n	3903		900		684
Single	1832 (47)		374 (42)		314 (46)
Married/civil partner	1449 (37)		376 (42)		275 (40)
Separated	263 (7)		51 (6)		36 (5)
Divorced	244 (6)		63 (7)		46 (7)
Widowed	113 (3)		36 (4)		13 (2)
Prefer not to say	2 (0.1)		-		-
Living arrangements, n	3908		908		681
Alone	806 (21)		186 (21)		149 (22)
Spouse/partner	756 (19)		209 (23)		143 (21)
Children	955 (24)		210 (23)		161 (9)
Parents/relatives	485 (12)		88 (10)		63 (9)
Roommates/friends	119 (3)		21 (2)		19 (3)
Spouse/partner and children	766 (20)		194 (21)		141 (21)
Prefer not to say	21 (0.5)		-		5 (1)
	N	Mean ± SD	N	Mean ± SD	N	Mean ± SD
Age, years	4478	47.2 ± 13.1	1244	49.3 ± 13.7	902	48.8 ± 12.2
IMD, decile	4371	4 ± 23	1203	5 ± 2.4	874	5 ± 2.4
Income, decile	4371	4 ± 2.5	1203	4 ± 2.6	874	4 ± 2.6
Employment, decile	4371	5 ± 2.5	1203	5 ± 2.5	874	5 ± 2.5
Education and skills, decile	4371	6 ± 2.1	1203	6 ± 2.1	874	6 ± 2.1
Health and disability, decile	4371	6 ± 2.4	1203	6 ± 2.5	874	6 ± 2.4
Crime, decile	4371	4 ± 2.2	1203	4 ± 2.2	874	4 ± 2.2
Barriers to housing and services, decile	4371	3 ± 1.5	1203	3 ± 1.6	874	3 ± 1.5
Living environment, decile	4371	3 ± 1.9	1203	4 ± 2	874	4 ± 1.9
