# Supplementary material for: A cohort profile and process evaluation of an adult multidisciplinary behavioural and weight management service in a diverse UK population
Source: Research Square preprint supplement (doi:10.21203/rs.3.rs-7724834/v1), 2026-01-30
Supplement: Supplementary file 3 [file b70ddc6a12f56783454e8f8d.xlsx]

## Sheet: Sheet1
Supplementary Table 3: Results of multivariate logistic regression analyses to predict programme completion of the Southeast London Healthy Living Programme. Multivariate regression, data as OR (95% CI).
	B	Wald	p-value	OR	95% CI
Weight, kg	-0.006	1.227	0.268	0.994	0.983, 1.005
BMI, kg/m2	0.023	1.949	0.163	1.023	0.991, 1.059
Highest weight, kg	0	0.033	0.855	1	0.996, 1.005
Age, y	0.005	1.018	0.313	0.995	-
Confidence	-0.041	1.843	0.175	0.959	0.901, 1.035
Motivation	-0.035	0.982	0.322	0.965	0.904, 1.019
Deprivation	0.004	0.035	0.852	1.004	0.959, 1.052
Programme*	0.089	0.616	0.433	1.093	0.876, 1.363
Sex, female	0.412	5.628	0.018	1.509	1.074, 2.121
Ethnicity
White	-	0.813	0.016	-	-
Black African/Caribbean	-0.301	0.5132	0.023	0.74	0.57, 0.96
Other	0.181	1.139	0.286	1.199	0.859, 1.672
Relationship status
Single	-	4.261	0.119	-	-
Married/civil partner	-0.037	0.086	0.77	0.963	0.75, 1.237
Separated/divorced/widowed	-0.355	4.006	0.045	0.701	0.495, 0.993
* Face to face and virtual programmes were collapsed together for both Balance and Kickstart due to reduced sample size for both virtual programmes.
